# Supplementary material
Source: Elsevier journal article supplement (https://www.sciencedirect.com/science/article/pii/S253005391730295X)
Supplement: mmc1 [file S253005391730295X:mmc1.docx]

| **Apêndice 1** Estratégias de busca utilizada nas bases de dados |
| --- |
|  |
| **MEDLINE (via PubMed)** |
| **1.** ((((((("antioxidants"[Pharmacological Action] OR "antioxidants"[MeSH Terms] OR "antioxidants"[All Fields]) OR anti-oxidant[All Fields]) OR "Vitamin E"[Mesh]) OR ("ascorbic acid"[MeSH Terms] OR vitamin C[Text Word])) OR ("carotenoids"[MeSH Terms] OR carotenoids[Text Word])) OR ("flavonoids"[MeSH Terms] OR flavonoids[Text Word])) OR ("glutathione"[MeSH Terms] OR glutathione[Text Word])) OR ("cysteine"[MeSH Terms] OR cysteine[Text Word]) |
| **2.** ((("Hearing Loss"[Mesh] OR "Hearing Loss, Noise-Induced"[Mesh]) OR "Hearing Loss, Sensorineural"[Mesh]) OR ototoxicity[All Fields] |
| **3.** (randomized controlled trial [pt] OR controlled clinical trial [pt] OR randomized controlled trials [mh] OR random allocation [mh] OR double-blind method [mh] OR single-blind method [mh] OR clinical trial [pt] OR clinical trials [mh] OR (“clinical trial” [tw]) OR ((singl* [tw] OR doubl* [tw] OR trebl* [tw] OR tripl* [tw]) AND (mask* [tw] OR blind* [tw])) OR (“latin square” [tw]) OR placebos [mh] OR placebo* [tw] OR random* [tw] OR research design [mh:noexp] OR follow-up studies [mh] OR prospective studies [mh] OR cross-over studies [mh] OR control* [tw] OR prospectiv* [tw] OR volunteer* [tw]) NOT (animal [mh] NOT human [mh]) |
| **4.** #1 AND #2 AND #3 |
|  |
| **Cochrane Clinical Trials** |
| (antioxidants OR “vitamin e” OR “ascorbic acid” OR carotenoids OR flavonoids OR cysteine OR glutathione) AND (“hearing loss” OR “hearing loss, noise-induced” OR “hearing loss, sensorineural” OR presbycusis OR ototoxicity): ti,ab,kw |
|  |
| **ScienceDirect** |
| (antioxidants OR “vitamin e” OR “ascorbic acid” OR carotenoids OR flavonoids OR cysteine OR glutathione) AND (“hearing loss” OR “hearing loss, noise-induced” OR “hearing loss, sensorineural” OR presbycusis OR ototoxicity) |
|  |
| **ClinicalTrials.gov** |
| (antioxidants OR “vitamin e” OR “ascorbic acid” OR carotenoids OR flavonoids OR cysteine OR glutathione) AND (“hearing loss” OR “hearing loss, noise-induced” OR “hearing loss, sensorineural” OR presbycusis OR ototoxicity)| Closed Studies | Interventional Studies |
|  |
| **LiLACS** |
| antioxidantes AND “perda auditiva” |
|  |
| **Scopus** |
| (TITLE-ABS-KEY((antioxidants OR “vitamin e” OR “ascorbic acid” OR carotenoids OR flavonoids OR cysteine OR glutathione)) AND TITLE-ABS-KEY((“hearing loss” OR “hearing loss, noise-induced” OR “hearing loss, sensorineural” OR presbycusis OR ototoxicity))) AND (“randomized controlled trial” OR “controlled clinical trial” OR “randomized clinical trial” OR “randomized trial”)AND DOCTYPE(ar) OR DOCTYPE(cp) OR DOCTYPE(no) OR DOCTYPE(sh) |
|  |
| **Web of Science** |
| Title: ((antioxidants OR vitamin e OR ascorbic acid OR carotenoids OR flavonoids OR cysteine OR glutathione) AND (hearing loss OR hearing loss, noise-induced OR hearing loss, sensorineural OR presbycusis OR ototoxicity)) |
|  |
| Filter: No patent |
|  |
| **Circumpolar Health Bibliographic Database; SciELO;The New York Academy of Medicine, ClinicalEvidence.com** |
| (antioxidants OR “Vitamin E” OR “ascorbic acid” OR carotenoids OR flavonoids OR cysteine OR glutathione) AND (“ hearing loss” OR “hearing loss, noise-induced” OR “hearing loss, sensorineural” OR presbycusis OR ototoxicity)AND (“randomized controlled trial” OR “controlled clinical trial” OR “randomized clinical trial” OR “randomized trial” ) |
|  |
| **OPENGREY.EU** |
| (antioxidants OR “Vitamin E” OR “ascorbic acid” OR carotenoids OR flavonoids OR cysteine OR glutathione) AND (“hearing loss” OR “hearing loss, noise-induced” OR “hearing loss, sensorineural” OR presbycusis OR ototoxicity) AND (“randomized controlled trial” OR “controlled clinical trial” OR “randomized clinical trial” OR “randomized trial” ) |
|  |
| **DissOnline.de “**Antioxidantien” AND Hörverlust” |

| **Apêndice 2** Textos completos excluídos da análise. | | |
| --- | --- | --- |
| **Fonte** | **Título** | **Motivo** |
| Romeo; Giorgetti | *Therapeutic effects of Vitamin A associated with vitamin E in perceptual hearing loss* | Artigo de 1985. |
| Nestrugina | *Effect of supplementary ingestion of Vitamins B1 and C on the function of the auditory organ in workers of “noisy” trades* | Artigo de 1969. |
| Creston; Gillespie, [Larson Al](http://www.ncbi.nlm.nih.gov/pubmed/?term=Larson%20AL%5BAuthor%5D&cauthor=true&cauthor_uid=5339343) | [*Bioflavonoid therapy in senxori-neural hearing loss: A double-blind study.*](http://www.ncbi.nlm.nih.gov/pubmed/5339343) | Artigo de 1966. |
| Ivstam | [*Vitamin A as a means of reducing industrial deafness.*](http://www.ncbi.nlm.nih.gov/pubmed/13718332) | Artigo de 1960. |
| Mann; Beck; Beck | *Calcium antagonists in the treatment of sudden deafness.* | Artigo de 1986. |
| Gordin et al. | *Antioxidants: a new armament in the treatment of idiopathic sudden hearing loss* | 2004 Artigo solicitado ao autor via e-mail, mas sem retorno. |
